# Supplementary material for: Clinical Heterogeneity in Monogenic Diabetes Caused by Mutations in the Glucokinase Gene (GCK-MODY)
Source: Oxford University Press journal article supplement (doi:10.2337/dc09-0681), 2009-11-10
Supplement: dc09-0681_online_appendix.pdf [file dc09-0681_online_appendix.pdf]

Online Appendix Figure A1

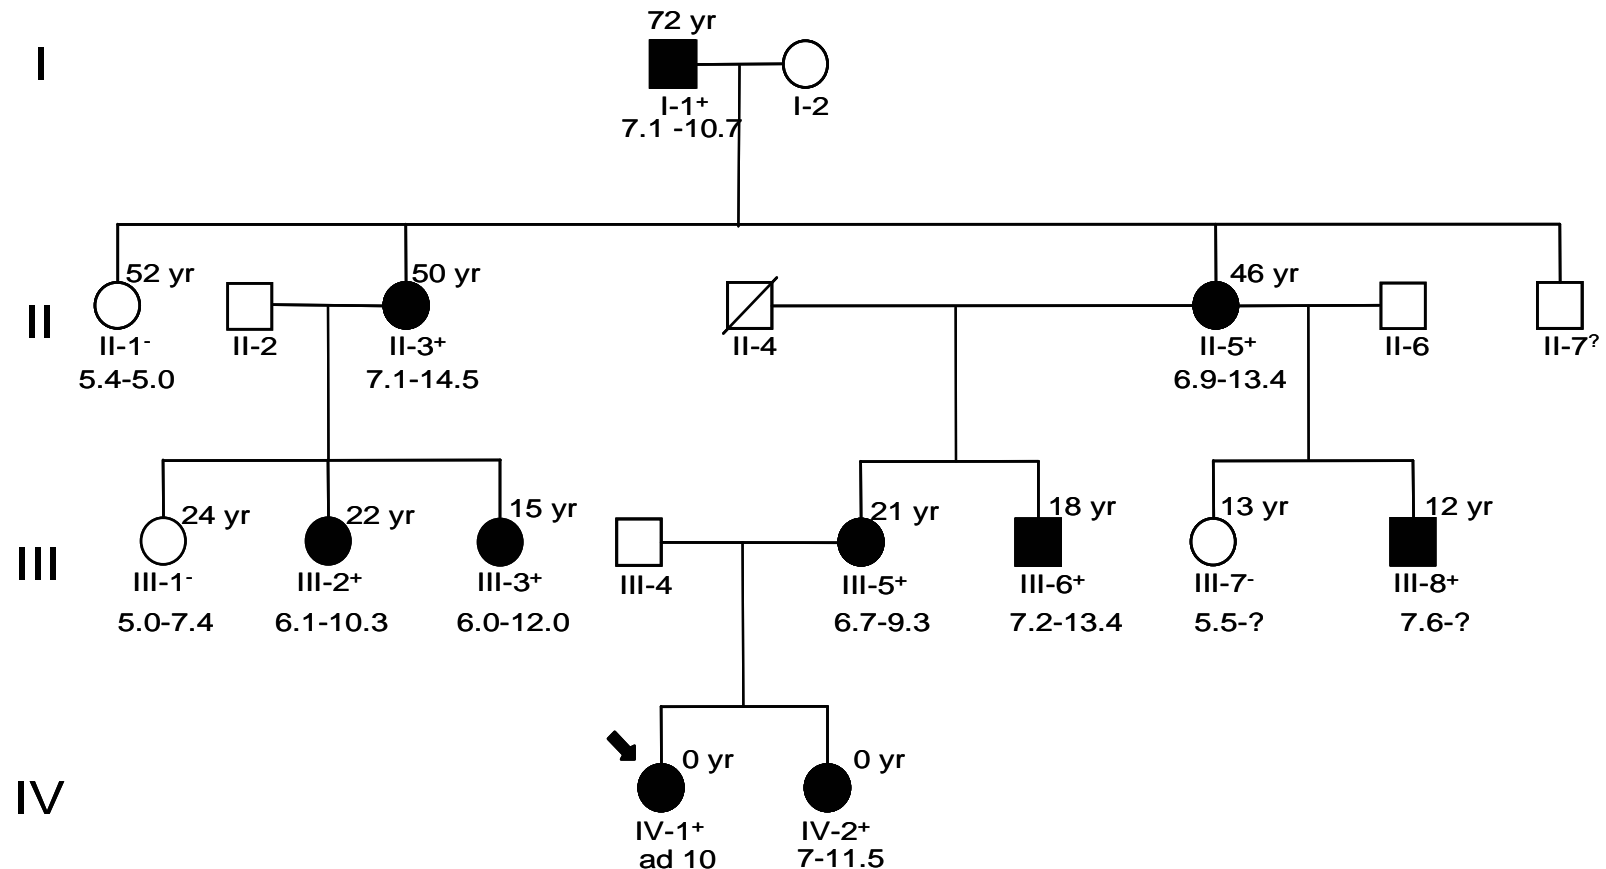

The pedigree shows the segregation of G261R mutation in the glucokinase gene in four generations of the family. Filled symbols indicate diabetes and non-filled symbols normal or unknown glucose tolerance. The age at investigation is given in the upper right hand side corner of the symbols, and the fasting and 2-hour plasma glucose below the symbols, except in the subject IV-1. Carrier status is given after the subjects identification (+=carrier, -= non-carrier, ?= not tested). Among the mutations carriers, the HbA1c range was 5.4 – 6.6%, BMI 19.8 – 29.5 kg/m<sup>2</sup> (in adults), S-triglycerides 0.39 – 1.27 mmol/l, S-HDL-cholesterol 0.92 – 1.51 mmol/l, and s-LDL cholesterol 2.2 – 4.31 mmol/l. The blood pressure was normal except for subject I1 (170/83 mmHg).

Table A1

|                 | <i>n</i> | <i>K<sub>cat</sub></i> |                                           | <i>Glucose S<sub>0.5</sub></i> |                                           | <i>AI</i>            |                                           | <i>n<sub>H</sub></i> | <i>ATP-K<sub>m</sub></i>                  |
|-----------------|----------|------------------------|-------------------------------------------|--------------------------------|-------------------------------------------|----------------------|-------------------------------------------|----------------------|-------------------------------------------|
|                 |          | a                      | EC <sub>50</sub><br>( $\mu\text{mol/l}$ ) | b                              | EC <sub>50</sub><br>( $\mu\text{mol/l}$ ) | g                    | EC <sub>50</sub><br>( $\mu\text{mol/l}$ ) | $^c n_H / ^a n_H$    | $^c \text{ATP}_{km} / ^a \text{ATP}_{km}$ |
| <b>GK-WT</b>    | 3        | 1.51±0.06              | 0.73±0.14                                 | 4.35±0.06                      | 0.87±0.06                                 | 19.6±1.33            | 6.73±0.71                                 | 1.13±0.02            | 0.91±0.05                                 |
| <b>GK-G261R</b> | 2        | 1.4<br>(1.48; 1.32)    | 0.6<br>(0.86; 0.34)                       | 4.3<br>(4.04; 4.56)            | 0.58<br>(0.68; 0.48)                      | 20.6<br>(17.4; 23.7) | 14.2<br>(10.2; 1.23)                      | 1.22<br>(1.20; 1.23) | 1.15<br>(1.04; 1.25)                      |

Results of the studies on the effect of GKA on GK-WT and mutant GK-G261R. Data for GK-WT are mean of three independent analyses. Data for GK-G261R are the result of two expressions, the means and the individual data are shown.  $\alpha$ ,  $\beta$  and  $\gamma$  represent the maximal fold drug effect on  $k_{cat}$ , glucose affinity and activity index respectively. \*EC50 values are the half-maximal drug concentrations for the effect on  $\alpha$ ,  $\beta$  and  $\gamma$ , c and a refer to control and activated enzyme, respectively.
